# Supplementary material for: Molecular Profiling of 22 Primary Atypical Meningiomas Shows the Prognostic Significance of 18q Heterozygous Loss and CDKN2A/B Homozygous Deletion on Recurrence-Free Survival
Source: Cancers (Basel). 2021 Feb 21;13(4):903. doi: 10.3390/cancers13040903 (PMC7927130; doi:10.3390/cancers13040903)
Supplement: Supplementary file 1 [file cancers-13-00903-s001.xlsx]

## Sheet: Foglio1
Table S1. List of somatic and germline mutations identified in 14 of the 22 atypical meningiomas. Cases are sorted by ID sample and alphabetical order
ID SAMPLE	GENE	STATUS	CHROM	POS	REF	ALT	var_freq	Existing_variation	Feature	SIFT	PolyPhen	Consequence	HGVSc	HGVSp	EXON	INTRON	CLIN_SIG	FATHmm_coding	FATHMM_noncoding
1M	AKT1	Somatic	chr14	105246551	C	T	35	rs121434592	NM_001014431.1	-	probably_damaging	missense_variant	NM_001014431.1:c.48G>A	NP_001014431.1:p.Glu17Lys	3/14	-	pathogenic	0.99513	0.99388
2M	MYCN	Somatic	chr2	16085612	CAGATGATGA	C	50	rs1370225717	NM_001293228.1	-	-	splice_acceptor_variant	NM_001293228.1:c.801_809del	NP_001280157.1:p.Asp267_Glu269del	3/3	2/2	-	-	-
2M	ARID2	Somatic	chr12	46125033	GAA	G	37	COSM6923834	NM_152641.2	-	-	frameshift_variant	NM_152641.2:c.221_222del	NP_689854.2:p.Glu74GlyfsTer10	3/21	-	-	-	-
2M	NF2	Somatic	chr22	30070877	GA	G	47	COSM6949343	NM_000268.3	-	-	frameshift_variant	NM_000268.3:c.1394del	NP_000259.1:p.Glu465GlyfsTer20	13/16	-	-	-	-
3M	-	-	-	-	-	-	-	-	-	-	-	-	-	-	-	-	-	-	-
4M	NF2	Somatic	chr22	30069466	C	G	66	COSM144190	NM_000268.3	-	-	stop_gained	NM_000268.3:c.1331C>G	NP_000259.1:p.Ser444Ter	12/16	-	-	0.99499	0.99595
5M	-	-	-	-	-	-	-	-	-	-	-	-	-	-	-	-	-	-	-
6M	NF2	Somatic	chr22	30035081	CCA	AC	30	-	NM_000268.3	-	-	frameshift_variant	NM_000268.3:c.293_295delinsAC	NP_000259.1:p.Ala98AspfsTer25	3/16	-	-	-	-
7M	ARID2	Somatic	chr12	46205268	C	A	42	-	NM_152641.2	0.06	probably_damaging	missense_variant	NM_152641.2:c.352C>A	NP_689854.2:p.Pro118Thr	4/21	-	-	0.98417	0.99551
7M	AKT1	Somatic	chr14	105246551	C	T	39	rs121434592	NM_001014431.1	-	probably_damaging	missense_variant	NM_001014431.1:c.48G>A	NP_001014431.1:p.Glu17Lys	3/14	-	pathogenic	0.99513	0.99388
8M	-	-	-	-	-	-	-	-	-	-	-	-	-	-	-	-	-	-	-
9M	NF2	Somatic	chr22	30057229	TGCCCTGGG	T	47	-	NM_000268.3	-	-	frameshift_variant	NM_000268.3:c.714_721del	NP_000259.1:p.Leu239SerfsTer4	8/16	-	-	-	-
10M	NF2	Somatic	chr22	30070822	CA	CG	46	-	NM_000268.3	-	-	splice_acceptor_variant	NM_000268.3:c.1341-2delinsG	-	-	12/15	-	-	-
11M	-	-	-	-	-	-	-	-	-	-	-	-	-	-	-	-	-	-	-
12M	CDKN2C	Somatic	chr1	51436126	T	TA	80	-	NM_001262.2	-	-	frameshift_variant	NM_001262.2:c.89dup	NP_001253.1:p.Asn30LysfsTer30	2/3	-	-	-	-
12M	MYH9	Somatic	chr22	36708207	C	T	46	COSM1216259	NM_002473.5	-	probably_damaging	missense_variant	NM_002473.5:c.1615G>A	NP_002464.1:p.Asp539Asn	14/41	-	-	0.96209	0.96841
13M	FBXW7	Somatic	chr4	153247289	G	A	42	rs149680468	NM_033632.3	-	probably_damaging	missense_variant	NM_033632.3:c.1513C>T	NP_361014.1:p.Arg505Cys	10/12	-	likely_pathogenic	0.94469	0.96341
13M	RET	Germline	chr10	43620335	C	T	44	rs17158558	NM_020975.4	0.01	possibly_damaging	missense_variant	NM_020975.4:c.2944C>T	NP_066124.1:p.Arg982Cys	18/20	-	pathogenic	0.6652	0.96552
13M	CHEK2	Somatic	chr22	29130431	C	T	89	rs587782070	NM_001005735.1	-	-	stop_gained	NM_001005735.1:c.279G>A	NP_001005735.1:p.Trp93Ter	2/16	-	pathogenic	0.9511	0.99147
13M	NF2	Somatic	chr22	30038274	G	C	80	COSM1235346	NM_000268.3	-	probably_damaging	missense_variant	NM_000268.3:c.447G>C	NP_000259.1:p.Lys149Asn	4/16	-	-	0.9801	0.97052
14M	PRKDC	Germline	chr8	48852163	G	A	50	rs988150797	NM_006904.6	0.01	possibly_damaging	missense_variant	NM_006904.6:c.1061C>T	NP_008835.5:p.Ser354Leu	11/86	-	-	0.98147	0.9832
14M	RET	Germline	chr10	43613907	TA	TT	44	rs77724903	NM_020975.4	0.08	possibly_damaging	missense_variant	NM_020975.4:c.2372delinsT	NP_066124.1:p.Tyr791Phe	13/20	-	pathogenic	-	-
14M	NF2	Somatic	chr22	30000069	AC	A	40	-	NM_000268.3	-	-	frameshift_variant	NM_000268.3:c.84del	NP_000259.1:p.Met29TrpfsTer11	1/16	-	-	-	-
15M	PTEN	Somatic	chr10	89692980	ATG	AT	12	COSM4718702	NM_000314.4	-	-	frameshift_variant	NM_000314.4:c.466del	NP_000305.3:p.Glu157LysfsTer2	5/9	-	-	-	-
15M	NF2	Somatic	chr22	30054229	C	G	60	COSM7145336	NM_000268.3	-	-	stop_gained	NM_000268.3:c.651C>G	NP_000259.1:p.Tyr217Ter	7/16	-	-	0.36883	0.96026
16M	ARID1A	Somatic	chr1	27106803	AC	A	64	COSM1341430	NM_006015.4	-	-	frameshift_variant	NM_006015.4:c.6420del	NP_006006.3:p.Phe2141SerfsTer59	20/20	-	-	-	-
16M	MSH2	Somatic	chr2	47657019	C	A	98	rs63751271	NM_000251.2	-	-	stop_gained	NM_000251.2:c.1215C>A	NP_000242.1:p.Tyr405Ter	7/16	-	pathogenic	0.74462	0.89219
16M	NF2	Somatic	chr22	30054176	AG	A	86	COSM1685245	NM_000268.3	-	-	splice_acceptor_variant	NM_000268.3:c.601del	NP_000259.1:p.Asp201MetfsTer8	-	6/15	-	-	-
16M	MYH9	Somatic	chr22	36716924	G	A	60	COSM1714338	NM_002473.5	-	probably_damaging	missense_variant	NM_002473.5:c.787C>T	NP_002464.1:p.Arg263Cys	8/41	-	-	0.92437	0.92664
17M	-	-	-	-	-	-	-	-	-	-	-	-	-	-	-	-	-	-	-
18M	-	-	-	-	-	-	-	-	-	-	-	-	-	-	-	-	-	-	-
19M	MUTYH	Germline	chr1	45797228	C	T	48	rs36053993	NM_001128425.1	-	probably_damaging	missense_variant	NM_001128425.1:c.1187G>A	NP_001121897.1:p.Gly396Asp	13/16	-	pathogenic	0.99757	0.99522
19M	BCL10	Somatic	chr1	85736510	AT	A	25	rs587776639	NM_003921.4	-	-	frameshift_variant	NM_003921.4:c.136del	NP_003912.1:p.Ile46TyrfsTer24	2/3	-	pathogenic	-	-
19M	DAXX	Somatic	chr6	33287909	CTCCTCT	C	47	rs772433267	NM_001141970.1	-	-	inframe_deletion	NM_001141970.1:c.1374_1379del	NP_001135442.1:p.Glu468_Glu469del	5/8	-	-	-	-
19M	NF2	Somatic	chr22	30067871	GA	G	67	-	NM_000268.3	-	-	frameshift_variant	NM_000268.3:c.1057del	NP_000259.1:p.Arg353GlyfsTer11	11/16	-	-	-	-
20M	-	-	-	-	-	-	-	-	-	-	-	-	-	-	-	-	-	-	-
21M	-	-	-	-	-	-	-	-	-	-	-	-	-	-	-	-	-	-	-
22M	RET	Germline	chr10	43620335	C	T	20	rs17158558	NM_020975.4	0.01	possibly_damaging	missense_variant	NM_020975.4:c.2944C>T	NP_066124.1:p.Arg982Cys	18/20	-	pathogenic	0.6652	0.96552
22M	ARID2	Somatic	chr12	46246566	GT	G	32	-	NM_152641.2	-	-	frameshift_variant	NM_152641.2:c.4662del	NP_689854.2:p.Ala1555LeufsTer11	15/21	-	-	-	-
22M	NF2	Somatic	chr22	30038266	C	T	50	COSM22194	NM_000268.3	-	-	stop_gained	NM_000268.3:c.439C>T	NP_000259.1:p.Gln147Ter	4/16	-	-	0.96482	0.96908
